# Supplementary material for: Carrier recombination dynamics in [MAPbCl3]x[CsPbBr3]1−x shell-passivated CsPbBr3 single crystals
Source: Royal Society of Chemistry journal article supplement (doi:10.1039/d4cp04310c), 2025-01-01
Supplement: d4cp04310c1.pdf [file d4cp04310c1.pdf]

# Supplementary information

## Carrier Recombination Dynamics in $[\text{MAPbCl}_3]_x[\text{CsPbBr}_3]_{1-x}$ Shell Passivated $\text{CsPbBr}_3$ Single Crystals

Zheng Zou,<sup>ab</sup> Zijie Xiao,<sup>a</sup> Wenxin Dong,<sup>c</sup> Wei Dang,<sup>\*c</sup> Shusheng Pan,<sup>ab</sup> Xiaojun Su<sup>d</sup> and Wei Zhang<sup>\*ab</sup>

<sup>a</sup> School of Physics and Materials Science, Guangzhou University, Guangzhou 510006, China

<sup>b</sup> Research Center for Advanced Information Materials (CAIM), Huangpu Research and Graduate School of Guangzhou University, Guangzhou 510006, China

<sup>c</sup> Hebei Key Lab of Optic-electronic Information and Materials, College of Physics Science and Technology, Hebei University, Baoding 071002, China

<sup>d</sup> School of Arts and Sciences, Guangzhou Maritime University, Guangzhou 510725, China

# Content

|                                                                                                                                                                                                                                                                        |   |
|------------------------------------------------------------------------------------------------------------------------------------------------------------------------------------------------------------------------------------------------------------------------|---|
| S1. Revealing the MAPbCl <sub>3</sub> and CsPbBr <sub>3</sub> content in [MAPbCl <sub>3</sub> ] <sub>x</sub> [CsPbBr <sub>3</sub> ] <sub>1-x</sub> shell by the correlation between PL peak energy of MAPbCl <sub>3</sub> and CsPbBr <sub>3</sub> single crystal ..... | 3 |
| S2. TRPL kinetics of CsPbBr <sub>3</sub> single crystals grown with and without choline bromide (CB) .....                                                                                                                                                             | 4 |
| S3. TRPL and TRMC kinetics of CsPbBr <sub>3</sub> (with CB) single crystals covered with and without shell .....                                                                                                                                                       | 5 |
| S4. TRPL and TRMC kinetics of CsPbBr <sub>3</sub> (with and without CB) single crystals covered with [MAPbCl <sub>3</sub> ] <sub>x</sub> [CsPbBr <sub>3</sub> ] <sub>1-x</sub> shells.....                                                                             | 6 |
| References .....                                                                                                                                                                                                                                                       | 7 |

## S1. Revealing the MAPbCl<sub>3</sub> and CsPbBr<sub>3</sub> content in [MAPbCl<sub>3</sub>]<sub>x</sub>[CsPbBr<sub>3</sub>]<sub>1-x</sub> shell by the correlation between PL peak energy of MAPbCl<sub>3</sub> and CsPbBr<sub>3</sub> single crystal

Many studies have shown that the bandgap of mixed perovskite is approximately linear with the composition of the corresponding components.<sup>1-4</sup> Assuming the bandgap of mixed crystal [MAPbCl<sub>3</sub>]<sub>x</sub>[CsPbBr<sub>3</sub>]<sub>1-x</sub> follow a linear correlation between the bandgap and x composition, which was determined by the bandgaps (PL peak energy) of pure MAPbCl<sub>3</sub> and CsPbBr<sub>3</sub> single crystals. Then, the composition x for [MAPbCl<sub>3</sub>]<sub>x</sub>[CsPbBr<sub>3</sub>]<sub>1-x</sub> shell can be determined as x = 0.34 for CsPbBr<sub>3</sub> grown without CB, see Figure S1.

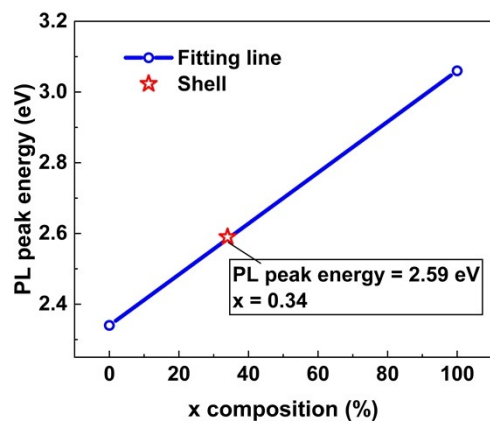

Fig. S1 The correlation between the content of MAPbCl<sub>3</sub> (x) and PL emission energy in mixed [MAPbCl<sub>3</sub>]<sub>x</sub>[CsPbBr<sub>3</sub>]<sub>1-x</sub> single crystal.

## S2. TRPL kinetics of CsPbBr<sub>3</sub> single crystals grown with and without choline bromide (CB)

Table S1. Fitting parameters for TRPL kinetics of CsPbBr<sub>3</sub> single crystals with and without CB additives. TRPL measurements were conducted upon 485 nm photoexcitation with an excitation fluence of  $4.9 \times 10^8 \text{ pulse}^{-1} \cdot \text{cm}^{-2}$ .

| Sample            | Decay |                  |       |                  |                  |
|-------------------|-------|------------------|-------|------------------|------------------|
|                   | $A_1$ | $\tau_1$<br>[ns] | $A_2$ | $\tau_2$<br>[ns] | $\tau_A$<br>[ns] |
| <b>With CB</b>    | 0.70  | 2.3              | 0.30  | 31.5             | 11.1             |
| <b>Without CB</b> | 0.70  | 4.0              | 0.30  | 37.8             | 14.1             |

### S3. TRPL and TRMC kinetics of CsPbBr<sub>3</sub> (with CB) single crystals covered with and without shell

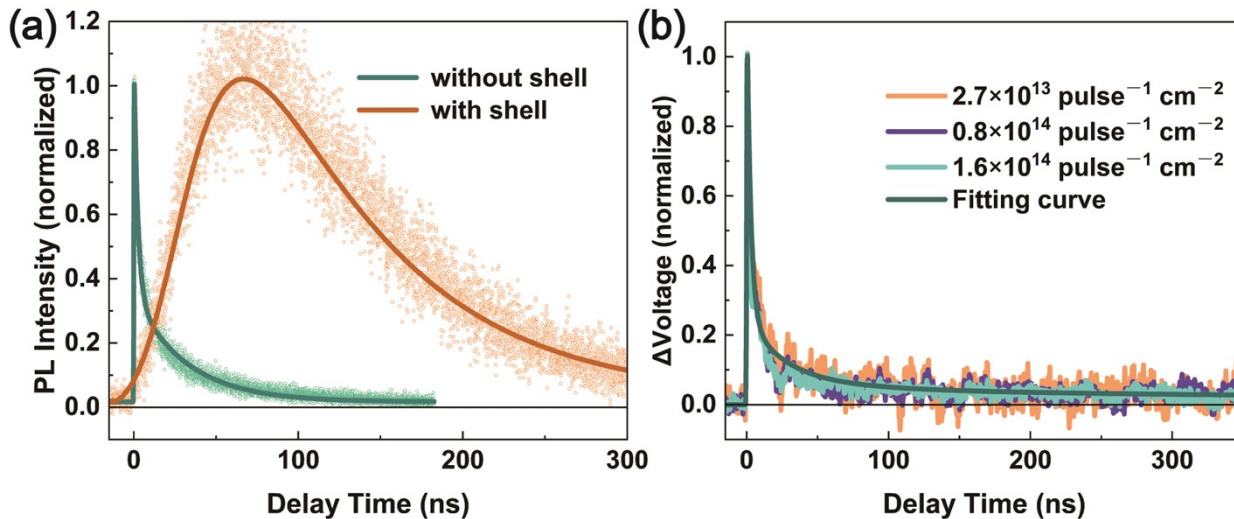

Fig. S2 (a) Comparison of TRPL kinetics between bare CsPbBr<sub>3</sub> (with CB) single crystals (SCs) and CsPbBr<sub>3</sub> (with CB) SCs covered with [MAPbCl<sub>3</sub>]<sub>x</sub>[CsPbBr<sub>3</sub>]<sub>1-x</sub> shell. TRPL measurements were conducted upon 485 nm photoexcitation with an excitation fluence of  $4.9 \times 10^8 \text{ pulse}^{-1} \cdot \text{cm}^{-2}$ . (b) TRMC kinetics of CsPbBr<sub>3</sub> (with CB) SCs covered with shell after 400 nm photoexcitation under the indicated excitation fluences. The solid lines are fitting curves based on multi-exponential functions, the detailed fitting parameters are shown in Table S2.

#### S4. TRPL and TRMC kinetics of CsPbBr<sub>3</sub> (with and without CB) single crystals covered with [MAPbCl<sub>3</sub>]<sub>x</sub>[CsPbBr<sub>3</sub>]<sub>1-x</sub> shells

Table S2. Fitting parameters for TRPL and TRMC kinetics of CsPbBr<sub>3</sub> (with and without CB) covered by [MAPbCl<sub>3</sub>]<sub>x</sub>[CsPbBr<sub>3</sub>]<sub>1-x</sub> shells.

| Sample     | TRPL  |                  |       |                  | TRMC  |                  |       |                  |       |                  |       |                  | $k_{t-r-a-p}$                  | $k_{t-r-d-p}$                  |
|------------|-------|------------------|-------|------------------|-------|------------------|-------|------------------|-------|------------------|-------|------------------|--------------------------------|--------------------------------|
|            | $A_1$ | $\tau_t$<br>[ns] | $A_2$ | $\tau_d$<br>[ns] | $A_1$ | $\tau_1$<br>[ns] | $A_2$ | $\tau_2$<br>[ns] | $A_3$ | $\tau_3$<br>[ns] | $A_4$ | $\tau_4$<br>[ns] | $[\times 10^6 \text{ s}^{-1}]$ | $[\times 10^6 \text{ s}^{-1}]$ |
| Without CB | -1    | 21               | 1     | 73.2             | 0.65  | IRF              | 0.17  | 21               | 0.11  | 73               | 0.07  | 1334             | 0.7                            | 13.6                           |
| With CB    | -1    | 25               | 1     | 82.9             | 0.75  | IRF              | 0.18  | 25               | 0.04  | 82               | 0.03  | 899              | 1.1                            | 12.1                           |

IRF: Instrumental response function;  $\tau_t$  and  $\tau_d$  are the rise lifetime and decay lifetime for TRPL kinetics, representing charge transfer from shell to core and carrier recombination processes in the core, respectively.

After photoexcitation at 485 nm, carriers may be generated in shell and core. For photogenerated carriers in the shell, both electrons and hole can be trapped by surface traps of shell or transferred from shell to core. Considering the proportional correlation between photoconductivity and carrier mobility, as well as the higher carrier mobility of MAPbCl<sub>3</sub> (179 cm<sup>2</sup>·V<sup>-1</sup>·s<sup>-1</sup>) than CsPbBr<sub>3</sub> (52 cm<sup>2</sup>·V<sup>-1</sup>·s<sup>-1</sup>), the transfer of carriers from shell to core may induce the decay of photoconductivity. Therefore, both surface trapping of charges in the shell or charge transfer from shell to core may induce the decay of photoconductivity. For carriers in the core, hole trapping and electron trapping would also induce the decay of photoconductivity. Therefore, TRMC kinetics of core shell samples were fitted with four exponential decay functions, representing electron and hole photoconductivity decays in the shell and in the core respectively.

## References

- 1 N. K. Kumawat, A. Dey, A. Kumar, S. P. Gopinathan, K. L. Narasimhan, and D. Kabra, *ACS Appl. Mater. Interfaces*, 2015, **7**, 13119–13124.
- 2 W. Wang, J. Su, L. Zhang, Y. Lei, D. Wang, D. Lu, and Y. Bai, *CrystEngComm*, 2018, **20**, 1635-1643.
- 3 Y. Zhang, Y. Liu, Y. Li, Z. Yang, and S. Liu, *J. Mater. Chem. C*, 2016, **4**, 9172-9178.
- 4 Z. Xiao, T. Tao, J. Shu, R. Pan, W. Dang, N. Zhao, S. Pan, and W. Zhang, *J. Phys. Chem. Lett.*, 2023, **14**, 245-252.
